# Supplementary material for: MetaClass, a Comprehensive Classification System for Predicting the Occurrence of Metabolic Reactions Based on the MetaQSAR Database
Source: MDPI journal article supplement (doi:10.3390/molecules26195857), 2021-09-27
Supplement: s1 [file s1]

| Name                                                                                                                                                                                                                                                                                                                     | Type of descriptor | Software   |
|--------------------------------------------------------------------------------------------------------------------------------------------------------------------------------------------------------------------------------------------------------------------------------------------------------------------------|--------------------|------------|
| Number of Angles<br>Number of Atoms<br>Number of Bonds<br>Number of Torsions<br>Number of Flexible Torsions<br>Number of Heavy Atoms<br>Number of Improper<br>Number of Rings<br>Number of Chiral Atoms<br>Number of Double Bonds<br>Number of Hbond Acceptor groups<br>Number of Hbond Donor groups<br>Molecular Weight | Constitutive       | VEGA       |
| Solvent accessible surface (SAS)<br>Sav<br>Sdiam<br>Molecular VdW Surface<br>Polar surface Area<br>Vdiam<br>Radius of Gyration<br>Molecular Ovality<br>Molecular Volume                                                                                                                                                  | Geometrical        | VEGA       |
| Lipole<br>Virtual LogP computed by MLP approach                                                                                                                                                                                                                                                                          | Physicochemical    | VEGA       |
| Heat of Formation<br>Total Energy<br>Electronic Energy<br>Core Core Repulsion<br>Molecular Dipole<br>HOMO Energy<br>LUMO Energy<br>Mulliken Electronegativity<br>Parr Pople Absolute Hardness<br>Nucleophilic delocalization (Dn_Total)<br>Electrophilic delocalization (De_Total)<br>self-polarizability (Pis_Total)    | Stereo-electronic  | MOPAC 2016 |

**Table S2.** List of the descriptors included in the study. Details concerning each descriptor can be found in the Manual of VEGA or MOPAC and in the references cited therein.

| Algorithm        | redox | hydrolyses | conjugations | average |
|------------------|-------|------------|--------------|---------|
| RF               | 0.44  | 0.52       | 0.36         | 0.44    |
| ADTree           | 0.25  | 0.45       | 0.33         | 0.34    |
| BFTree           | 0.36  | 0.48       | 0.31         | 0.38    |
| ForestPA         | 0.42  | 0.50       | 0.38         | 0.43    |
| FT               | 0.38  | 0.44       | 0.30         | 0.37    |
| SimpleCART       | 0.34  | 0.50       | 0.34         | 0.39    |
| J48              | 0.40  | 0.50       | 0.33         | 0.41    |
| J48consolidated  | 0.40  | 0.49       | 0.35         | 0.41    |
| J48 graft        | 0.40  | 0.49       | 0.34         | 0.41    |
| LADTree          | 0.26  | 0.48       | 0.33         | 0.36    |
| LMT              | 0.41  | 0.52       | 0.38         | 0.44    |
| NBTree           | 0.36  | 0.43       | 0.33         | 0.37    |
| Optimized forest | 0.42  | 0.52       | 0.35         | 0.43    |
| REPTree          | 0.34  | 0.51       | 0.31         | 0.39    |
| SPAARC           | 0.36  | 0.51       | 0.34         | 0.40    |
| SysFor           | 0.42  | 0.48       | 0.37         | 0.42    |
| BayesNet         | 0.24  | 0.29       | 0.18         | 0.24    |
| NaiveBayes       | 0.21  | 0.25       | 0.22         | 0.23    |
| SVM              | 0.34  | 0.10       | 0.18         | 0.21    |
| MLP              | 0.39  | 0.51       | 0.36         | 0.42    |
| SGD              | 0.33  | 0.52       | 0.32         | 0.39    |
| SMO              | 0.32  | 0.51       | 0.32         | 0.38    |
| IBK              | 0.39  | 0.43       | 0.30         | 0.37    |
| Kstar            | 0.39  | 0.36       | 0.28         | 0.34    |
| Multiclass       | 0.37  | 0.47       | 0.32         | 0.39    |
| AdaBoostM1       | 0.27  | 0.44       | 0.34         | 0.35    |
| Regression       | 0.37  | 0.47       | 0.35         | 0.40    |
| RandomComitee    | 0.40  | 0.46       | 0.34         | 0.40    |
| Decision Table   | 0.31  | 0.49       | 0.35         | 0.38    |
| MODLEM           | 0.39  | 0.44       | 0.34         | 0.39    |

**Table S3.** MCC values obtained for the three major classes by using an extended set of classification algorithms implemented by Weka. Details concerning these algorithms can be found within the Weka Manual.
